# Supplementary material for: Urban runoff drives titanium dioxide engineered particle concentrations in urban watersheds: field measurements
Source: Royal Society of Chemistry journal article supplement (doi:10.1039/d2en00826b), 2022-12-28
Supplement: d2en00826b1.pdf [file d2en00826b1.pdf]

## **Supporting information for**

### **Urban runoff drives titanium dioxide engineered particle concentrations in urban watersheds: field measurements**

Md. Mahmudun Nabi<sup>a</sup>, Jingjing Wang<sup>a</sup>, Mahdi Erfani<sup>b</sup>, Erfan Goharian<sup>b</sup>, and Mohammed

Baalousha<sup>a\*</sup>

#### **Affiliations:**

<sup>a</sup> Center for Environmental Nanoscience and Risk, Department of Environmental Health Sciences,  
Arnold School of Public Health, University of South Carolina, SC 29208, USA

<sup>b</sup> Department of Civil and Environmental Engineering, University of South Carolina, SC 29208,  
USA

\* Corresponding author: [mbaalous@mailbox.sc.edu](mailto:mbaalous@mailbox.sc.edu)

## 1. Detailed description of the sampling locations

**Saluda River:** Water samples were collected from the lower Saluda River, Hope ferry landing, Columbia, SC 29072 (34°02'45.7"N 81°11'27.3"W) which is approximately 2.7 kms downstream from the Lake Murray dam (**Figure 1**). The Lower Saluda River flows out of the Lake Murray dam and merges downstream with the Broad River. Therefore, lower Saluda River is an engineered river controlled from the Lake Murray dam. Lake Murray serves as a retention reservoir for the suspended particulate matters, those come with the stream of upstream Saluda River. The Saluda River is approximately 291 km long, originates in the Blue Ridge Mountains of northwest of Greenville County, South Carolina, and flows generally southeastwardly in South Carolina <sup>1</sup>. The Saluda River basin covers approximately 6535 square kilometers and contains twenty-one (21) watershed <sup>2</sup>. The dominant land use throughout the Saluda River basin is forested (53.7%); agricultural (26.1%); urban (12.9%); water (4.2%) and others (0.1-3.3%); swampland, barren land and marshland. There are permitted 9 major wastewater treatment plants (WWTP); 15 minor WWTPs; 92 industrial, mining and quarrying facilities, 35 municipal separate stormwater facilities in the Saluda River basin <sup>3</sup>. The Saluda River is crossed 26 times by many highways, and three of those highway's bridges cross the Saluda River near the sampling location. The lake Murray dam (34°03'14.4"N 81°13'9.8"W) on highway 6 between the lake Murray and lower Saluda River is situated 2.75km upstream from the sampling location, and had an estimated AADT of 26,700 in 2019 <sup>4</sup>. The I20 bridge over Saluda River (34°01'31.7"N 81°07'42.9"W) is situated 6.2kms downstream from the sampling location, and had an estimated AADT of 84,000 in 2019 <sup>4</sup>. The interstate I26 bridge (34°01'25.7"N 81°06'12.6"W) over Saluda River is situated 8.4km downstream from the sampling location, and had an estimated AADT of 95,400 in 2019 <sup>5</sup>.

Water samples were collected from the Saluda River during a range of hydrologic conditions (**Table S5**). There had been 20.5 mm rainfall (in total) during the entire sampling campaign with a major rainfall event of 15.7 mm occurred on 30/4/2020 near the sampling location. Major rainfall events of 54.5 mm and 3.1 mm occurred on 29/4/2020 and 30/4/2020 in the upstream region of the Saluda River at Rock reservoir, Cleveland, SC <sup>6</sup>. The rainfall and discharge data were collected from the USGS station number 02168504 (34°03'03"N 81°12'35"W), nearly 1.8 km upstream from the sampling location.

**Broad River:** Water samples were collected from the Broad River, Columbia rowing club, Columbia, SC 29201 (34°02'36.9"N 81°04'23.7"W) (**Figure 1**). The Broad River is approximately 240 km long, originates in the Blue Ridge Mountains of eastern Buncombe County, North Carolina, and flows generally south-southeastwardly in South Carolina. The total catchment area of the Broad River is approximately 14,000 square kilometers. Apart from the forested land (66%) in the headwaters of the Broad River basin; the dominant land use throughout the Broad River basin is agricultural (23%); urban (9%); commercial and residential; others (2-4%); mining operations, and logging operations. There are permitted 14 major wastewater treatment plants (WWTP), 30 minor WWTPs, 20 animal operation facilities, 92 general and individual stormwater facilities in the Broad River basin <sup>7</sup>. The Broad River is crossed 22 times by many highways. There are three bridges crossing the Broad River near the sampling location. The interstate I20 bridge (34°02'52.5"N 81°04'23.6"W) over Broad River is situated 481m upstream from the sampling location, and had an estimated AADT of 119,100 in 2019 <sup>5</sup>. The Broad River bridge on highway 176 (34°01'33.3"N 81°04'9.9"W) is situated 2 kms downstream from the sampling location, and had an estimated AADT of 24,400 in 2019 <sup>5</sup>. The interstate I126 bridge (34°00'33.7"N 81°03'36.1"W) over Broad River is situated 4km downstream from the sampling location, and had an estimated AADT of 71,800 in 2019 <sup>5</sup>.

Water samples were collected from the Broad River during a range of hydrologic conditions (**Table S4**). There had been 18.8 mm rainfall (in total) during the entire sampling campaign with a major rainfall event of 16.8 mm occurred on 30/4/2020 near the sampling location. Moreover, there were major rainfall events of 40.2 mm and 9.7 mm occurred on 29/4/2020 in the upstream region of the Broad River at Ashville, NC and Knoxville, TN respectively <sup>8,9</sup>. The rainfall data was collected from the USGS station number 021695045 (34°00'24"N 81°01'18"W), nearly 3.1 km from the sampling location. The **discharge** data was

collected from the USGS station number 02162035 (34°02'54"N 81°04'24"W), nearly 5.3 km upstream of the sampling location.

**Congaree River:** Water samples had been collected from the Congaree River at West Columbia Riverwalk, West Columbia, SC 29169 (33°59'35.4"N 81°03'1.8"W) and Thomas Newman public boat landing, Cayce, SC 29033 (33°56'57.3"N 81°01'44.1"W) (**Figure 1**). Thomas Newman public boat landing sampling location is 5.3 km downstream of West Columbia Riverwalk sampling location. The Congaree River basin is formed by the confluence of the Saluda and Broad River basins in central South Carolina near Columbia. Therefore, the Broad River and Saluda River merge to form the Congaree River, which flows southeasterly for 50 miles and merges with the Wateree River to form the Santee River Basin which finally discharges into the Atlantic Ocean. The Congaree River basin area is 1785 square kilometers and contains four (04) watersheds. In the Congaree River basin, 34.6% is forested land, 26.6% is agricultural land, 19.0% is forested wetland (swamp), 17.9% is urban land, 0.3% is barren land, 1.3% is water, and 0.3% is non-forested wetland (marsh). There are permitted 2 major wastewater treatment plants (WWTP); 4 minor WWTPs; 35 industrial, mining and quarrying facilities; 20 municipal separate stormwater facilities in the Congaree River basin <sup>3</sup>. The Congaree River is crossed 7 times by many highways. There are three bridges crossing the Congaree River near the sampling locations. The Jarvis Klapman Blvd bridge (33°59'57.2"N 81°03'12.3"W) on highway 12 and The Gervais street bridge on highway 1 (33°59'43.8"N 81°03'6.9"W) are situated 729 m and 288 m respectively upstream from the Congaree River, Columbia sampling location, and had an estimated AADT of 22,700 and 28,000 respectively in 2019 <sup>4</sup>. The Blossom street bridge (33°59'17"N 81°02'48"W) on highway 176 over Congaree River is situated 674 m downstream from the Congaree River, Columbia sampling location and 4.6 km upstream from the Congaree River, Cayce sampling location, and had an estimated AADT of 27,500 in 2019 <sup>5</sup>.

Congaree River is downstream from the confluence of the Saluda and Broad River, therefore, the prevailed diverse climatic or hydrologic conditions on the upstream of the Saluda and Broad River during the sampling campaign also affected the Congaree River. Moreover, the Congaree River basin's hydrologic conditions had also been diverse during the water samples collection (**Table S4**). There had been 18.8 mm rainfall (in total) during the entire sampling campaign with a major rainfall event of 16.8 mm occurred on 30/4/2020 near the sampling location. The rainfall data was collected from the USGS station number 021695045 (34°00'24"N 81°01'18"W), nearly 3.1 km from the West Columbia Riverwalk sampling location and 6.4 km from the Thomas Newman public boat landing sampling location. The discharge data were collected from the USGS station number 02169500 (33°59'35"N 81°03'00"W), nearly 0.05 km from the West Columbia Riverwalk sampling location and 5.3 km from the Thomas Newman public boat landing sampling location.

## 2. Sample digestion

The bulk river water samples were digested in 15 mL Teflon vessels (Savillex, Eden Prairie, MN, United States) on custom-made Teflon covered hotplates placed in a box equipped with double-HEPA filtered forced air in a metal-free HEPA filtered air clean lab. 10 mL water aliquots or 5 mL extracted particle suspensions were placed in the vessel and weighed (Mettler Toledo, Excellence Plus, Columbus, OH, United States). Samples were dried at 110°C and treated with 1 mL of 30% H<sub>2</sub>O<sub>2</sub> (Fisher Chemical, Fair Lawn, NJ, United States) for 2 h at 70°C to remove organic matters. H<sub>2</sub>O<sub>2</sub> was then evaporated, and the sample was digested with 2 mL of HF:HNO<sub>3</sub> (3:1) mixture (ACS grade acids distilled in the laboratory, Sigma Aldrich, St. Louis, MO, United States) for 48 h at 110°C. After evaporation of the acid mixture at 110°C, the residue was reacted with 1 mL of distilled HNO<sub>3</sub> to break up insoluble fluoride salt that may have formed during the sample digestion and HNO<sub>3</sub> was left to evaporate at 110°C. This step was repeated twice before weighing the sample and adding 5 mL of 1% HNO<sub>3</sub>. The sample was sonicated for 10 min in a sonication bath (Branson, 2800, 40kHz, Danbury, CT, United States) and warmed for 2 h at 50°C for full dissolution. The solution was transferred to 15 mL polypropylene centrifuge tubes (Fisher Scientific, San Nicolás de los Garza, Nuevo León, Mexico) and stored at 4°C. Samples were centrifuged (Eppendorf, 5810 R, Hamburg, Germany) for 5 min at 3100 g prior to ICP-MS analysis as prophylactic measure to remove

any undigested minerals in order to prevent clogging of the ICP-TOF-MS introduction system. This step does not impact the recovery (approximately 100%), precision (2-3%), or the accuracy (better than 5%) of metal analysis as demonstrated in our previous studies <sup>10,11</sup>.

**Table S1.** Power plants on the Broad River.

| Power plant                                             | GPS Coordinates               | Type   | Distance from the sampling site | Type of dam/water control      |
|---------------------------------------------------------|-------------------------------|--------|---------------------------------|--------------------------------|
| Duke Energy -- Cliffside Plant                          | 35°12'47.9"N,<br>81°45'39.2"W | Thermo | 145 km                          |                                |
| Broad River energy, Cherokee                            | 35°4'53.4"N,<br>81°34'18.9"W  | Thermo | 124 km                          |                                |
| Power plant 1, Cherokee                                 | 35°3'52.2"N,<br>81°32'41.6"W  | Hydro  | 120 km                          | Gravity-type concrete spillway |
| Magna Energy Systems                                    | 34°59'57.5"N,<br>81°56'11.6"W | Hydro  | 132 km                          | Low head                       |
| Lower Pacolet Hydro                                     | 34°55'11.9"N,<br>81°44'16.2"W | Hydro  | 115 km                          | Low head                       |
| Lockhart Power Company                                  | 34°46'46.3"N,<br>81°27'24.9"W | Hydro  | 89 km                           | Diversion and Low head         |
| Neal Shoals Hydro, Union Hydroelectric project          | 34°39'51.8"N,<br>81°26'54.8"W | Hydro  | 77 km                           | Low head                       |
| SCE&G - Fairfield Pumped Storage, Jenkinsvile, SC 29065 | 34°18'19.7"N,<br>81°19'54.8"W | Hydro  | 38 km                           | Diversion                      |
| Virgil C. Summer Nuclear Station                        | 34°17'52.5"N,<br>81°18'55.9"W | Thermo | 36 km                           |                                |
| Parr hydro                                              | 34°15'35.2"N,<br>81°19'50.4"W | Hydro  | 34 km                           | low head                       |
| Columbia Hydroelectric Project                          | 34°0'8.5"N,<br>81°3'14.8"W    | Hydro  | 4 km                            | low head                       |

**Table S2.** The annual average daily traffic (AADT) on the bridges crossing the Broad, Saluda and Congaree Rivers near the sampling locations in 2019.

| <b>Name of the River</b> | <b>Highways</b>                        | <b>GPS coordinates</b>       | <b>Distance from respective sampling location</b> | <b>AADT</b> | <b>Ref</b>   |
|--------------------------|----------------------------------------|------------------------------|---------------------------------------------------|-------------|--------------|
| Saluda River             | The interstate I26 bridge              | 34°01'25.7"N<br>81°06'12.6"W | 8.4 km downstream                                 | 95,400      | <sup>5</sup> |
|                          | The I20 bridge                         | 34°01'31.7"N<br>81°07'42.9"W | 6.2 km downstream                                 | 84,000      | <sup>4</sup> |
|                          | The lake Murray dam                    | 34°03'14.4"N<br>81°13'9.8"W  | 2.75 km upstream                                  | 26,700      | <sup>4</sup> |
| Broad river              | The interstate I126 bridge             | 34°00'33.7"N<br>81°03'36.1"W | 4 km downstream                                   | 71,800      | <sup>5</sup> |
|                          | The Broad River bridge on highway 176  | 34°01'33.3"N<br>81°04'9.9"W  | 2 km upstream                                     | 24,400      | <sup>5</sup> |
|                          | The interstate I20 bridge              | 34°02'52.5"N<br>81°04'23.6"W | 481 m upstream                                    | 119,000     | <sup>5</sup> |
| Congaree River           | The Jarvis Klapman Blvd bridge         | 33°59'57.2"N<br>81°03'12.3"W | 729 m upstream<br>Columbia sampling location      | 22,700      | <sup>4</sup> |
|                          | The Gervais Street bridge on highway 1 | 33°59'43.8"N<br>81°03'6.9"W  | 288 m upstream<br>Columbia sampling location      | 28,000      | <sup>4</sup> |
|                          | The Blossom Street bridge              | 33°59'17"N<br>81°02'48"W     | 4.6 km upstream the<br>Cayce sampling location    | 27,500      | <sup>5</sup> |

### 3. Operating conditions of TOFWERK ICP-TOF-MS.

**Table S3.** TOFWERK ICP-TOF-MS operating conditions.

| 55. TOF WERK FOR TOF MS operating conditions. |                                                                   |     |     |      |     |  |
|-----------------------------------------------|-------------------------------------------------------------------|-----|-----|------|-----|--|
| Instrument parameter                          | Value                                                             |     |     |      |     |  |
| Plasma Power                                  | 1550 V                                                            |     |     |      |     |  |
| Nebulizer Gas Flow                            | 1.1 L/min                                                         |     |     |      |     |  |
| Auxiliary Gas Flow                            | 0.8 L/min                                                         |     |     |      |     |  |
| Cooling Gas Flow                              | 14 L/min                                                          |     |     |      |     |  |
| Injector Diameter                             | 2.5 mm                                                            |     |     |      |     |  |
| Collision Cell Gas                            | 5 mL/min He with 4.5% H <sub>2</sub>                              |     |     |      |     |  |
| CCT Bias                                      | -4.15 V                                                           |     |     |      |     |  |
| Notch                                         | Mass                                                              | 29  | 32  | 36.3 | 41  |  |
|                                               | Amplitude (V)                                                     | 1.6 | 2.0 | 2.0  | 1.2 |  |
| TOF Repetition Rate                           | 33 kHz                                                            |     |     |      |     |  |
| Detected Mass Range                           | 14-275 m/Z                                                        |     |     |      |     |  |
| (CeO/Ce)                                      | < 3.0%                                                            |     |     |      |     |  |
| Data Acquisition                              | Continuous Mode                                                   |     |     |      |     |  |
| TOF Time Resolution                           | 300 ms for elemental concentration,<br>2 ms for particle analysis |     |     |      |     |  |
| Sample Flow Rate                              | 0.4 mL/min                                                        |     |     |      |     |  |

### 4. Elemental analysis of standard materials

**Table S4.** Elemental analysis of the USGS reference materials BHVO-2 Hawaiian basalts.

| Concentration (µg/kg) | Mean                   | Standard Deviation     | Recommended values <sup>12</sup> | Precision (%) | Error (%) | Accuracy (%) |
|-----------------------|------------------------|------------------------|----------------------------------|---------------|-----------|--------------|
| <sup>27</sup> Al      | 7.55 x 10 <sup>7</sup> | 3.13 x 10 <sup>6</sup> | 7.11 x 10 <sup>7</sup>           | 4.15          | 6.1       | 93.9         |
| <sup>49</sup> Ti      | 1.52 x 10 <sup>7</sup> | 5.73 x 10 <sup>5</sup> | 1.64 x 10 <sup>7</sup>           | 3.78          | 4.1       | 95.9         |
| <sup>57</sup> Fe      | 9.43 x 10 <sup>7</sup> | 3.44 x 10 <sup>6</sup> | 8.67 x 10 <sup>7</sup>           | 3.65          | 8.8       | 91.2         |
| <sup>90</sup> Zr      | 1.51 x 10 <sup>5</sup> | 4.45 x 10 <sup>3</sup> | 1.71 x 10 <sup>5</sup>           | 2.94          | 11.7      | 91.9         |
| <sup>93</sup> Nb      | 1.57 x 10 <sup>4</sup> | 1.24 x 10 <sup>2</sup> | 1.81 x 10 <sup>4</sup>           | 0.79          | 11.0      | 89.0         |
| <sup>139</sup> La     | 1.38 x 10 <sup>4</sup> | 3.98 x 10 <sup>2</sup> | 1.52 x 10 <sup>4</sup>           | 2.89          | 2.9       | 97.1         |
| <sup>140</sup> Ce     | 3.39 x 10 <sup>4</sup> | 9.29 x 10 <sup>2</sup> | 3.75 x 10 <sup>4</sup>           | 2.74          | 4.3       | 95.7         |
| <sup>141</sup> Pr     | 4.77 x 10 <sup>3</sup> | 1.20 x 10 <sup>2</sup> | 5.34 x 10 <sup>3</sup>           | 2.52          | 4.8       | 95.2         |
| <sup>142</sup> Nd     | 2.23 x 10 <sup>4</sup> | 4.01 x 10 <sup>2</sup> | 2.43 x 10 <sup>4</sup>           | 1.80          | 2.0       | 98.0         |
| <sup>152</sup> Sm     | 5.70 x 10 <sup>3</sup> | 1.24 x 10 <sup>1</sup> | 6.02 x 10 <sup>3</sup>           | 0.22          | 5.3       | 94.7         |
| <sup>153</sup> Eu     | 1.91 x 10 <sup>3</sup> | 1.77 x 10 <sup>0</sup> | 2.04 x 10 <sup>3</sup>           | 0.09          | 6.3       | 93.7         |
| <sup>158</sup> Gd     | 6.33 x 10 <sup>3</sup> | 1.96 x 10 <sup>2</sup> | 6.21 x 10 <sup>3</sup>           | 3.10          | 1.9       | 98.1         |
| <sup>159</sup> Tb     | 9.06 x 10 <sup>2</sup> | 4.12 x 10 <sup>0</sup> | 9.39 x 10 <sup>2</sup>           | 0.45          | 3.5       | 96.5         |
| <sup>164</sup> Dy     | 5.01 x 10 <sup>3</sup> | 3.66 x 10 <sup>1</sup> | 5.28 x 10 <sup>3</sup>           | 0.73          | 5.1       | 94.9         |
| <sup>165</sup> Ho     | 9.42 x 10 <sup>2</sup> | 3.15 x 10 <sup>1</sup> | 9.89 x 10 <sup>2</sup>           | 3.34          | 4.7       | 95.3         |
| <sup>166</sup> Er     | 2.44 x 10 <sup>3</sup> | 4.12 x 10 <sup>0</sup> | 2.51 x 10 <sup>3</sup>           | 0.17          | 3         | 97.0         |
| <sup>169</sup> Tm     | 3.36 x 10 <sup>2</sup> | 2.38 x 10 <sup>1</sup> | 3.35 x 10 <sup>2</sup>           | 7.09          | 0.3       | 99.7         |
| <sup>174</sup> Yb     | 1.92 x 10 <sup>3</sup> | 3.20 x 10 <sup>1</sup> | 1.99 x 10 <sup>3</sup>           | 1.67          | 3.7       | 96.3         |
| <sup>175</sup> Lu     | 3.24 x 10 <sup>2</sup> | 2.61 x 10 <sup>1</sup> | 2.75 x 10 <sup>2</sup>           | 8.07          | 14.2      | 85.8         |

Precision (%) = standard deviation/mean \* 100

Error (%) = |(Measured concentration – recommended value)| / recommended value \* 100

Accuracy = 100 – Error (%)

## 5. Precipitation, discharge, base flow and runoff

**Table S5.** Total daily precipitation (mm) in the sampling locations, Columbia, SC during the sampling campaign. S: Lower Saluda River, B: Broad River, Co: Congaree River at Columbia, and C: Congaree River at Cayce, ADP: Antecedent dry period

| Date      | Precipitation<br>(B) | Precipitation<br>(Co and C) | Precipitation<br>(S) | ADP<br>(Days)<br>(C and B) | ADP<br>(Days)<br>(S) |
|-----------|----------------------|-----------------------------|----------------------|----------------------------|----------------------|
| 27/4/2020 | 0                    | 0                           | 0                    |                            |                      |
| 28/4/2020 | 0                    | 0                           | 0                    |                            |                      |
| 29/4/2020 | 0.5                  | 0.5                         | 2.5                  | 5                          | 4                    |
| 30/4/2020 | 16.8                 | 16.8                        | 15.7                 | 0                          | 0                    |
| 1/5/2020  | 0                    | 0                           | 0                    |                            |                      |
| 2/5/2020  | 0                    | 0                           | 0                    |                            |                      |
| 3/5/2020  | 0                    | 0                           | 0                    |                            |                      |
| 4/5/2020  | 0                    | 0                           | 0                    |                            |                      |
| 5/5/2020  | 0.5                  | 0.5                         | 0                    | 4                          |                      |
| 6/5/2020  | 0                    | 0                           | 1.5                  |                            | 5                    |
| 7/5/2020  | 0                    | 0                           | 0                    |                            |                      |
| 8/5/2020  | 1.0                  | 1.0                         | 0.8                  | 2                          | 1                    |
| 9/5/2020  | 0                    | 0                           | 0                    |                            |                      |
| 10/5/2020 | 0                    | 0                           | 0                    |                            |                      |
| 11/5/2020 | 0                    | 0                           | 0                    |                            |                      |
| 12/5/2020 | 0                    | 0                           | 0                    |                            |                      |

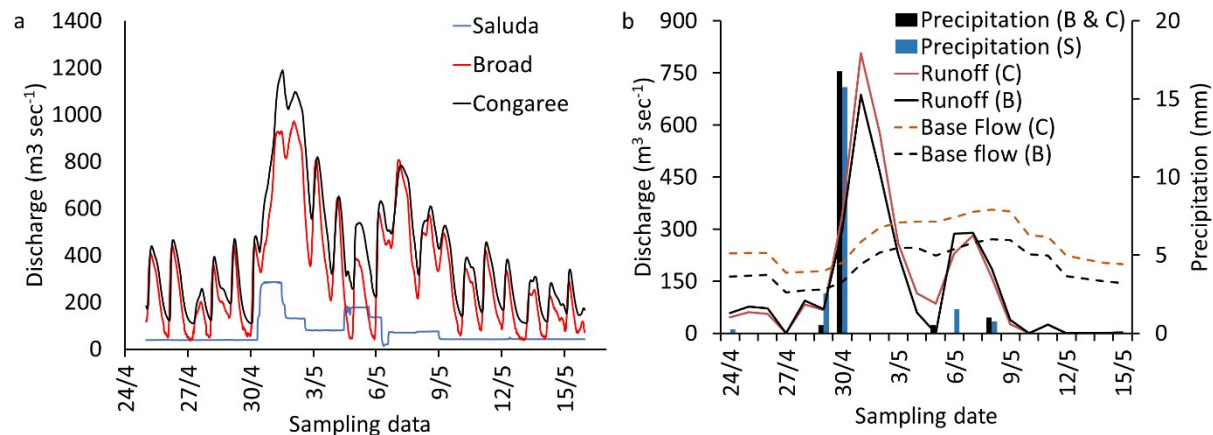

**Figure S1.** (a) 15-minutes time resolution discharge in the Saluda, Broad, and Congaree Rivers and (b) the separated runoff and baseflow in the Broad and Congaree Rivers based on daily discharge data together with the precipitation in Columbia, South Carolina near the Lower Saluda River (S), Broad and Congaree River (B & Co).

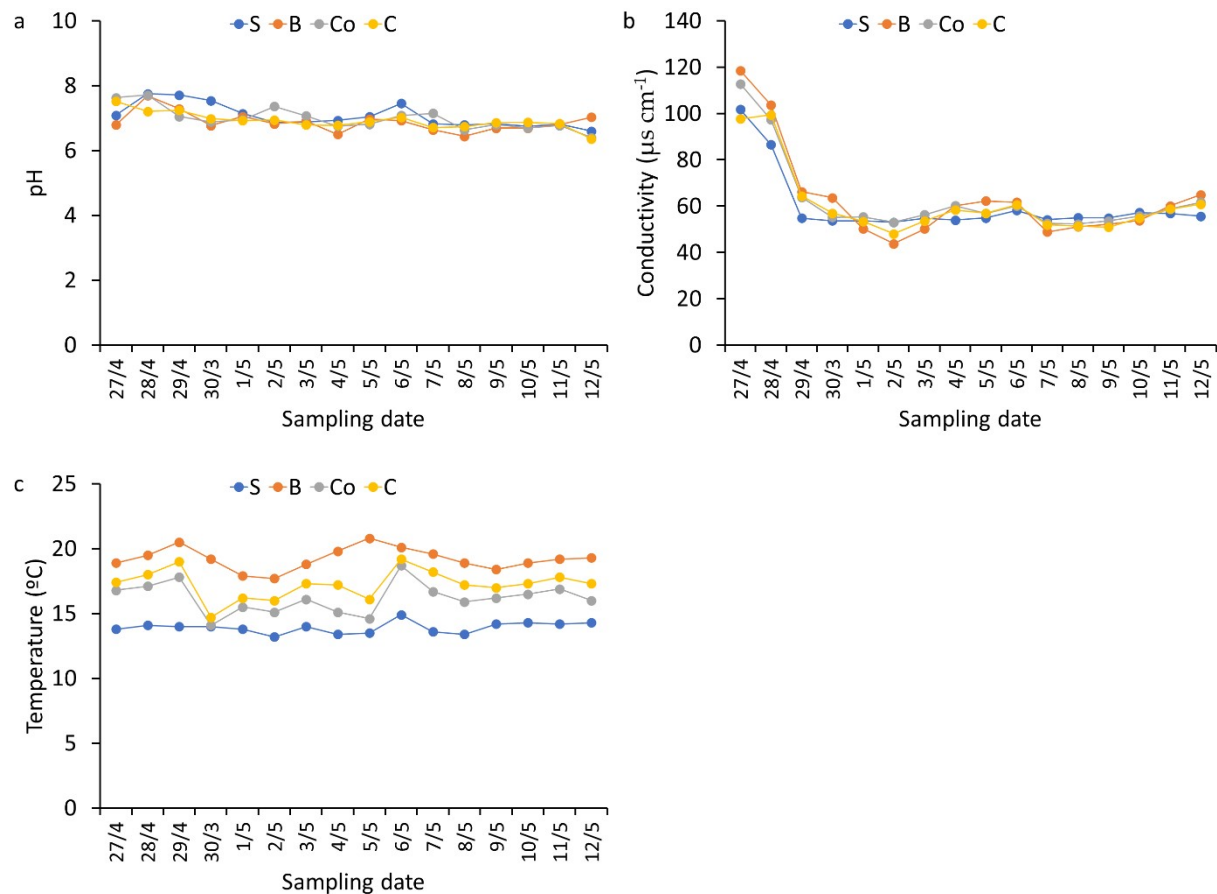

**Figure S2.** Water physicochemical properties at the sampling sites during the sampling period (a) pH, (b) conductivity, and (c) temperature. S: Lower Saluda River, B: Broad River, Co: Congaree River at Columbia, and C: Congaree River at Cayce.

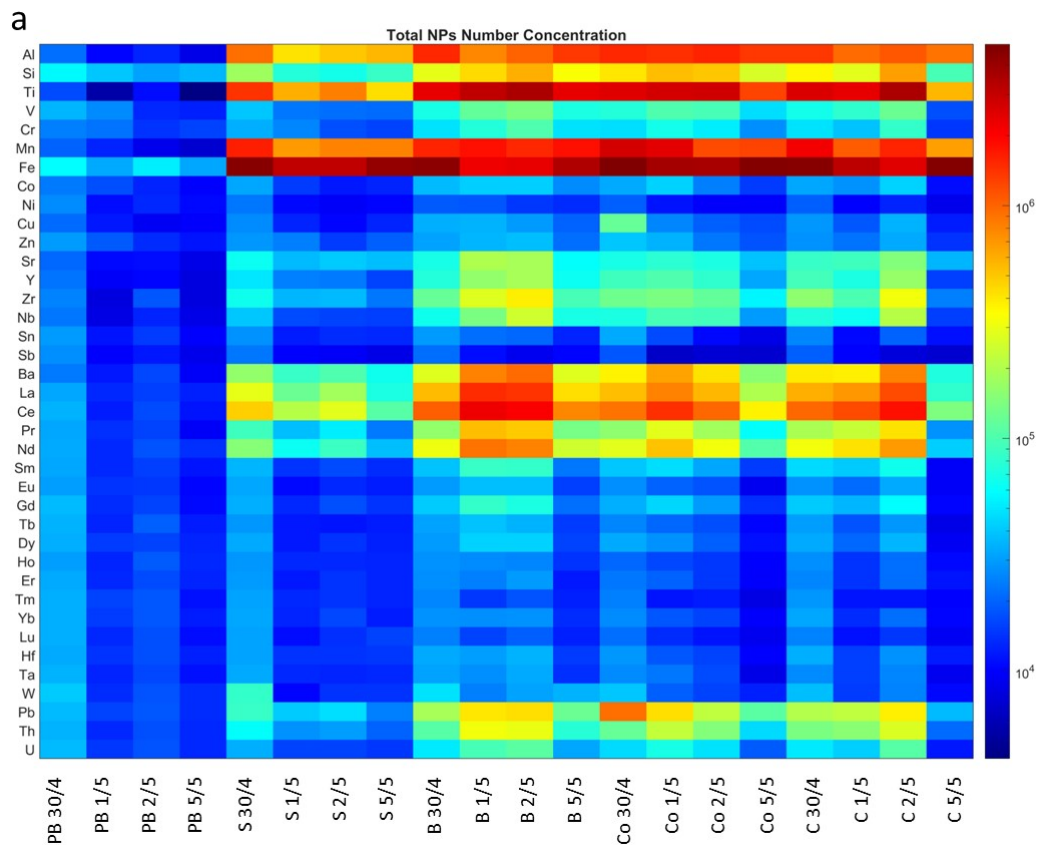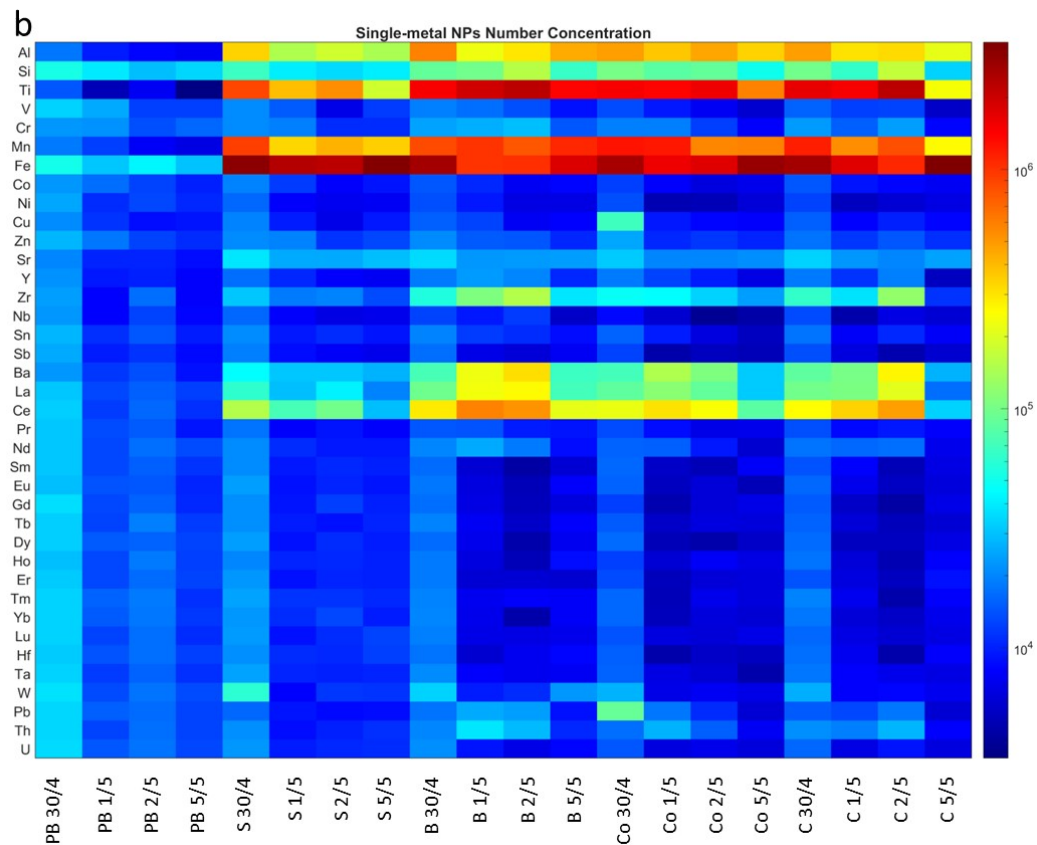

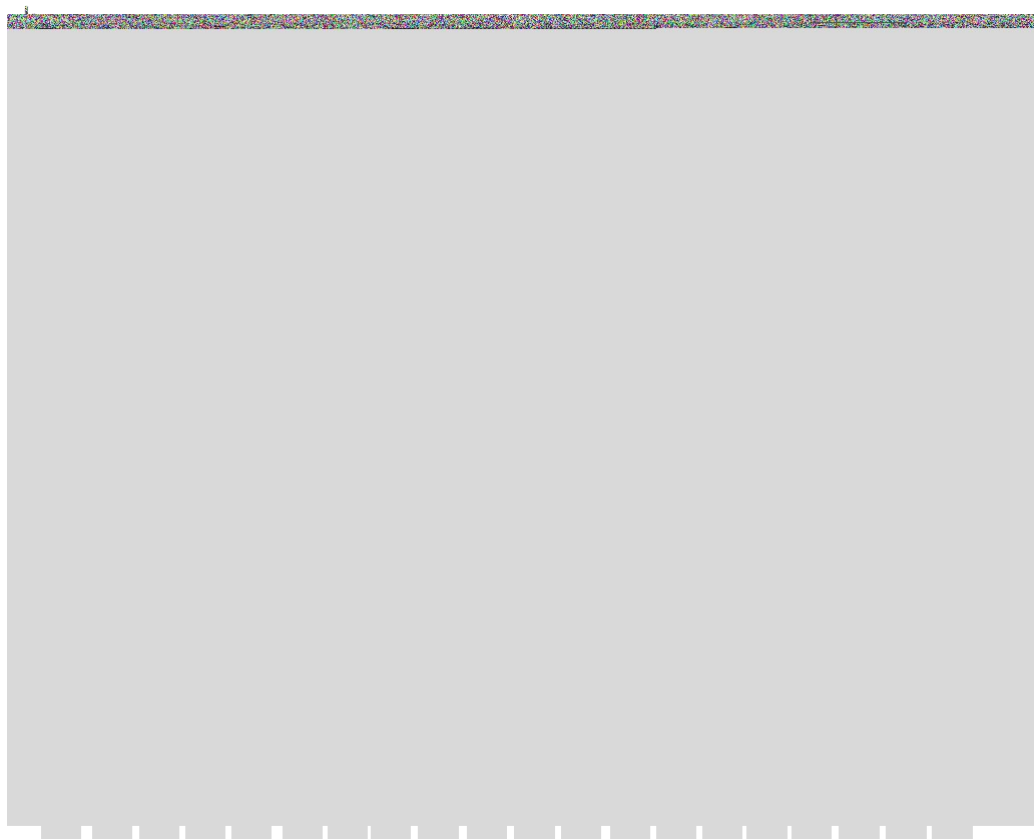

**Figure S3.** Uncorrected number concentrations of (a) NPs, (b) smNPs and (c) mmNPs in procedural blanks and the selected River samples. PB: procedural blanks, S: Lower Saluda River, B: Broad River, Co: Congaree River at Columbia, and C: Congaree River at Cayce.

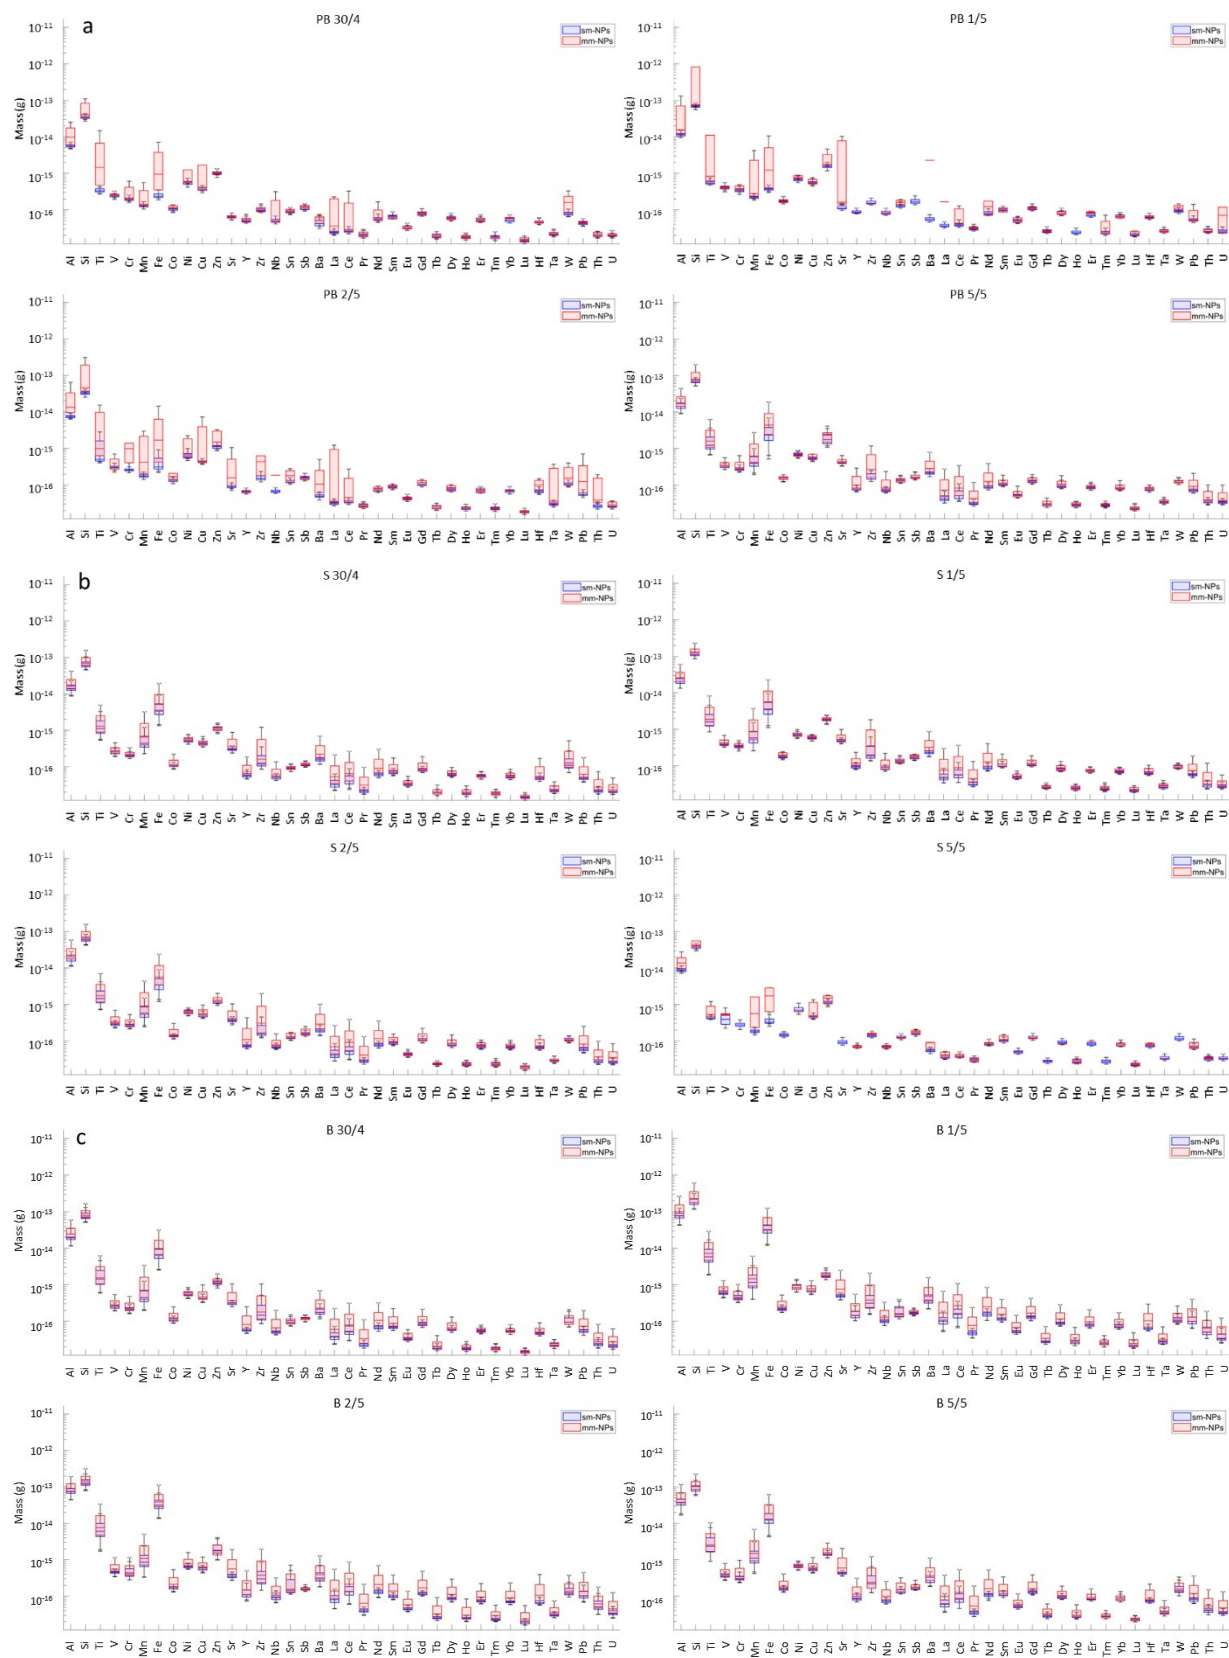

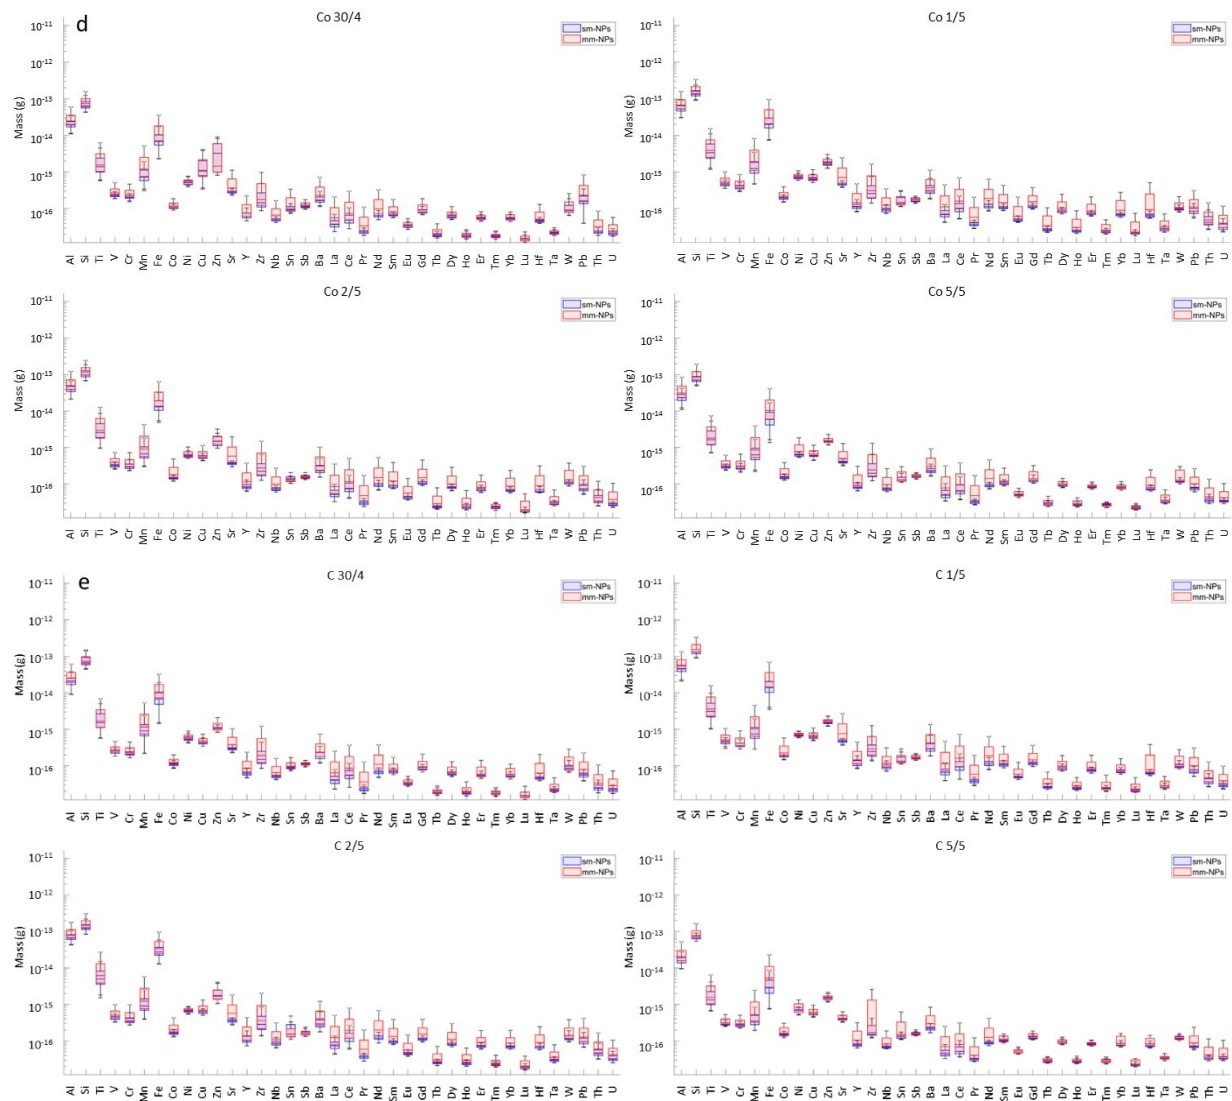

**Figure S4.** Mass distribution of smNPs (blue) and mmNPs (red) within individual particles in (a) procedural blanks (PB), (b) Lower Saluda River (S), (c) Broad River (B), (d) Congaree River at Columbia (Co), and (e) Congaree River at Cayce (C).

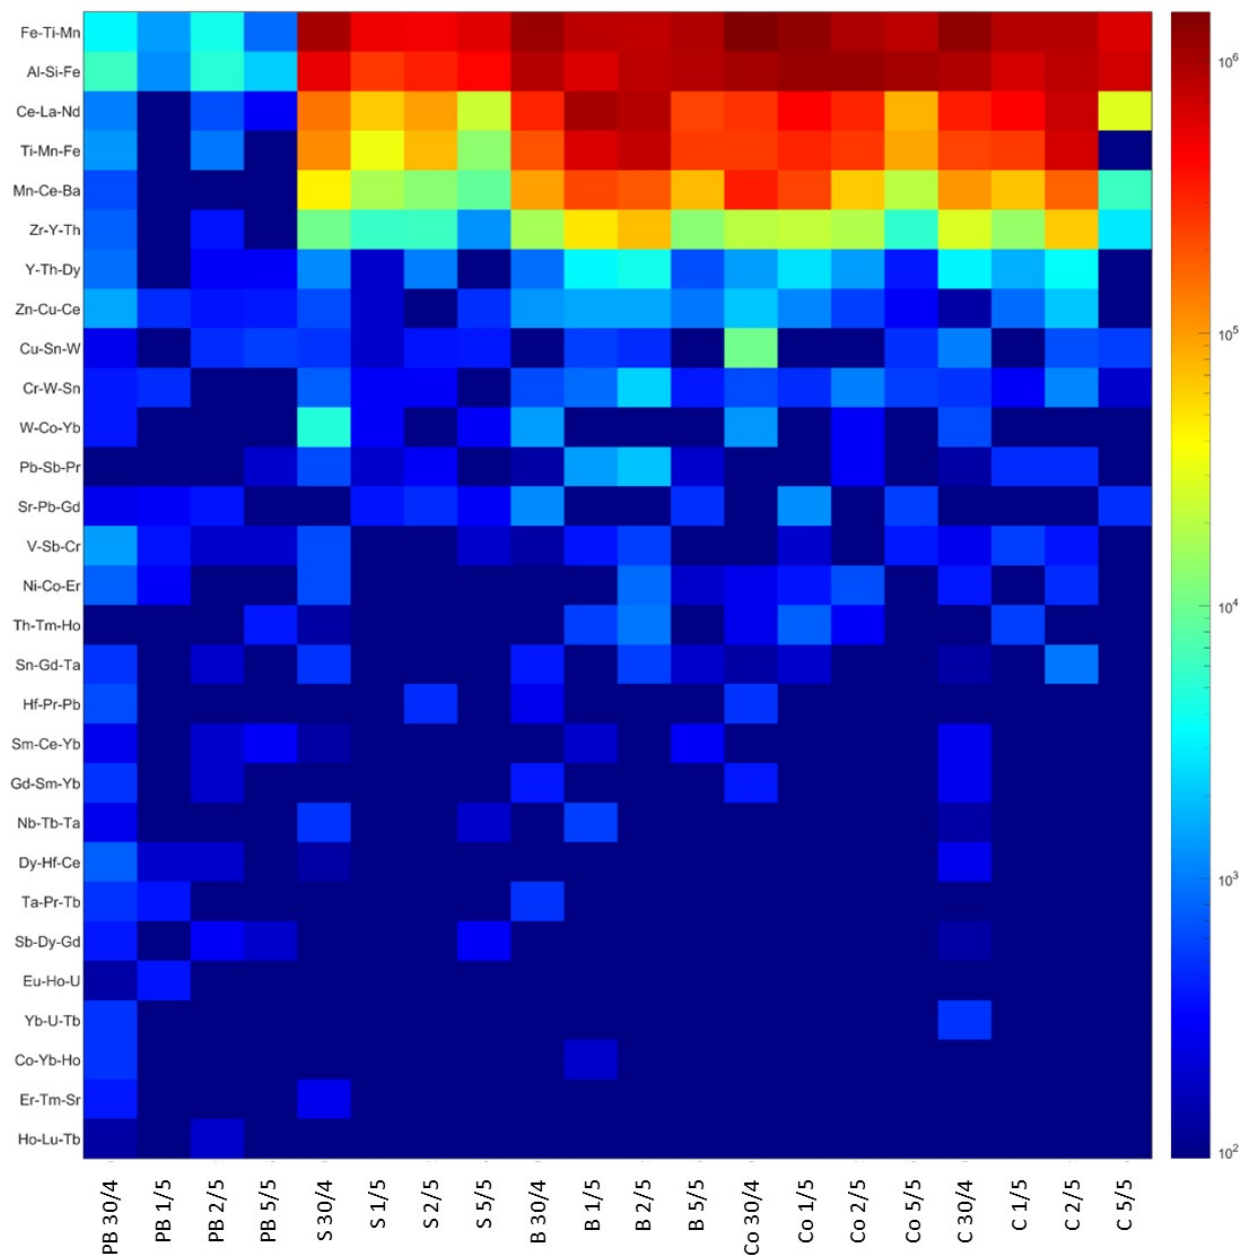

**Figure S5.** Number concentrations of the members of mmNP clusters. Clustering parameters were: maximum number of first stage clusters = 30, first and second stage cutoffs were 0.65 and 0.2. PB: procedural blank, S: Lower Saluda River, B: Broad River, Co: Congaree River at Columbia, and C: Congaree River at Cayce.

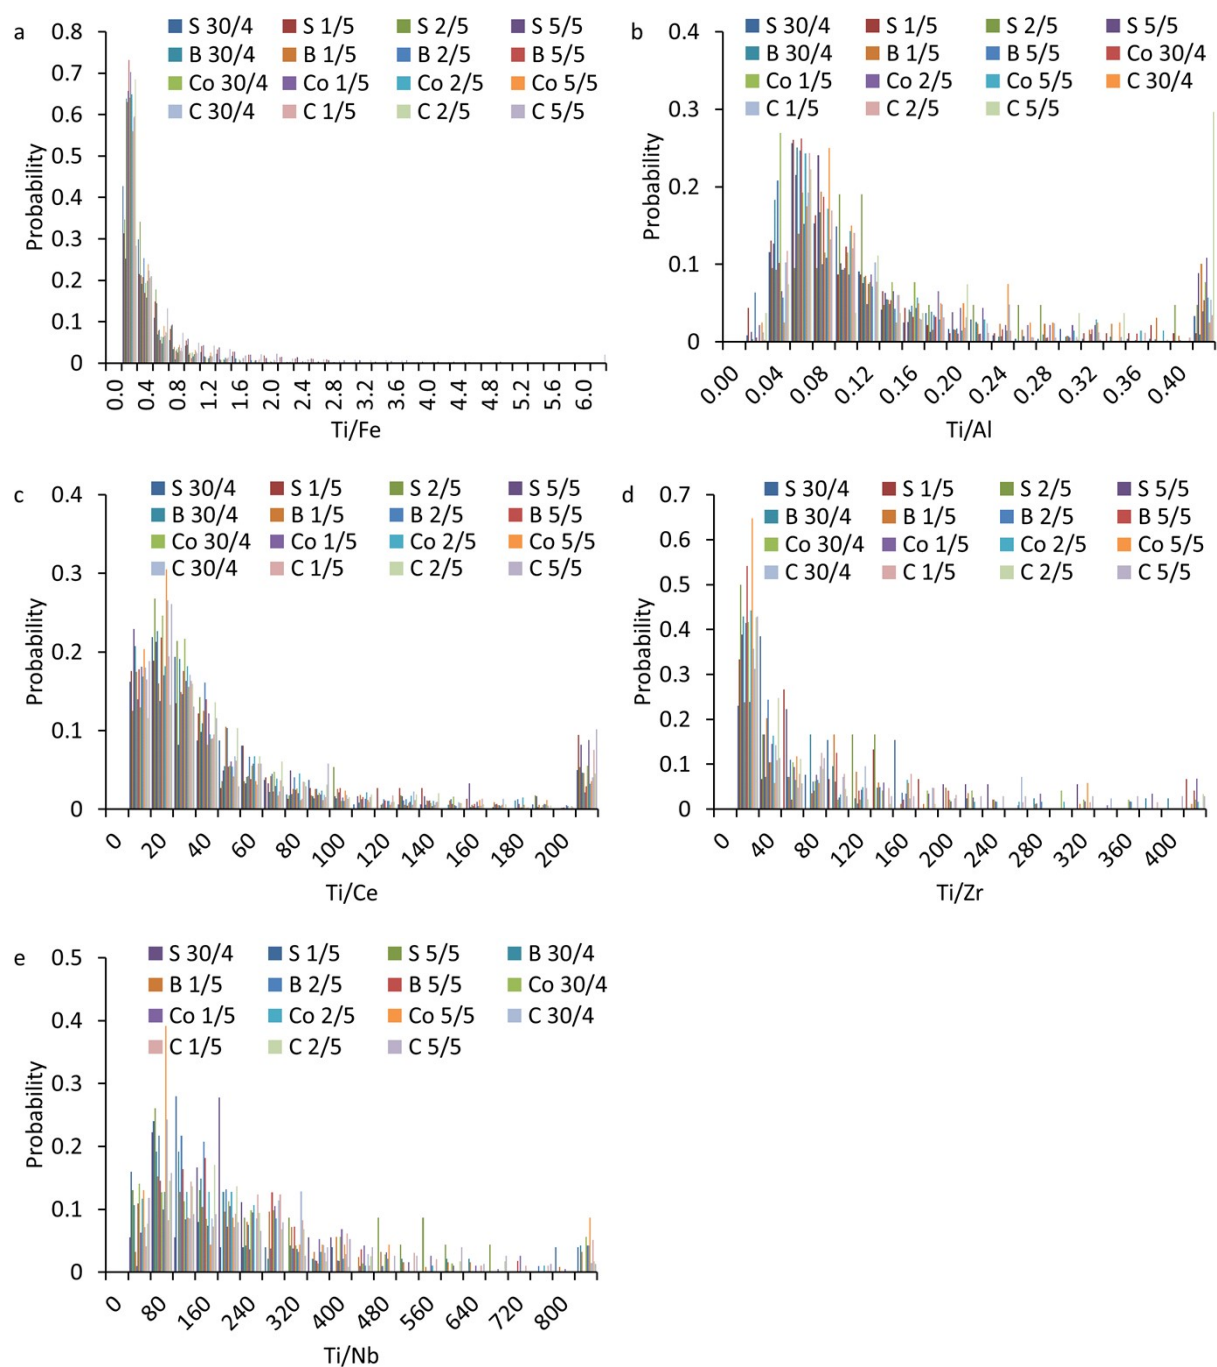

**Figure S6.** Elemental ratios of (a) Ti/Fe and (b) Ti/Al, and (c) Ti/Ce, (d) Ti/Zr, and (e) Ti/Nb in Fe-rich clusters. S: Lower Saluda River, B: Broad River, Co: Congaree River at Columbia, and C: Congaree River at Cayce.

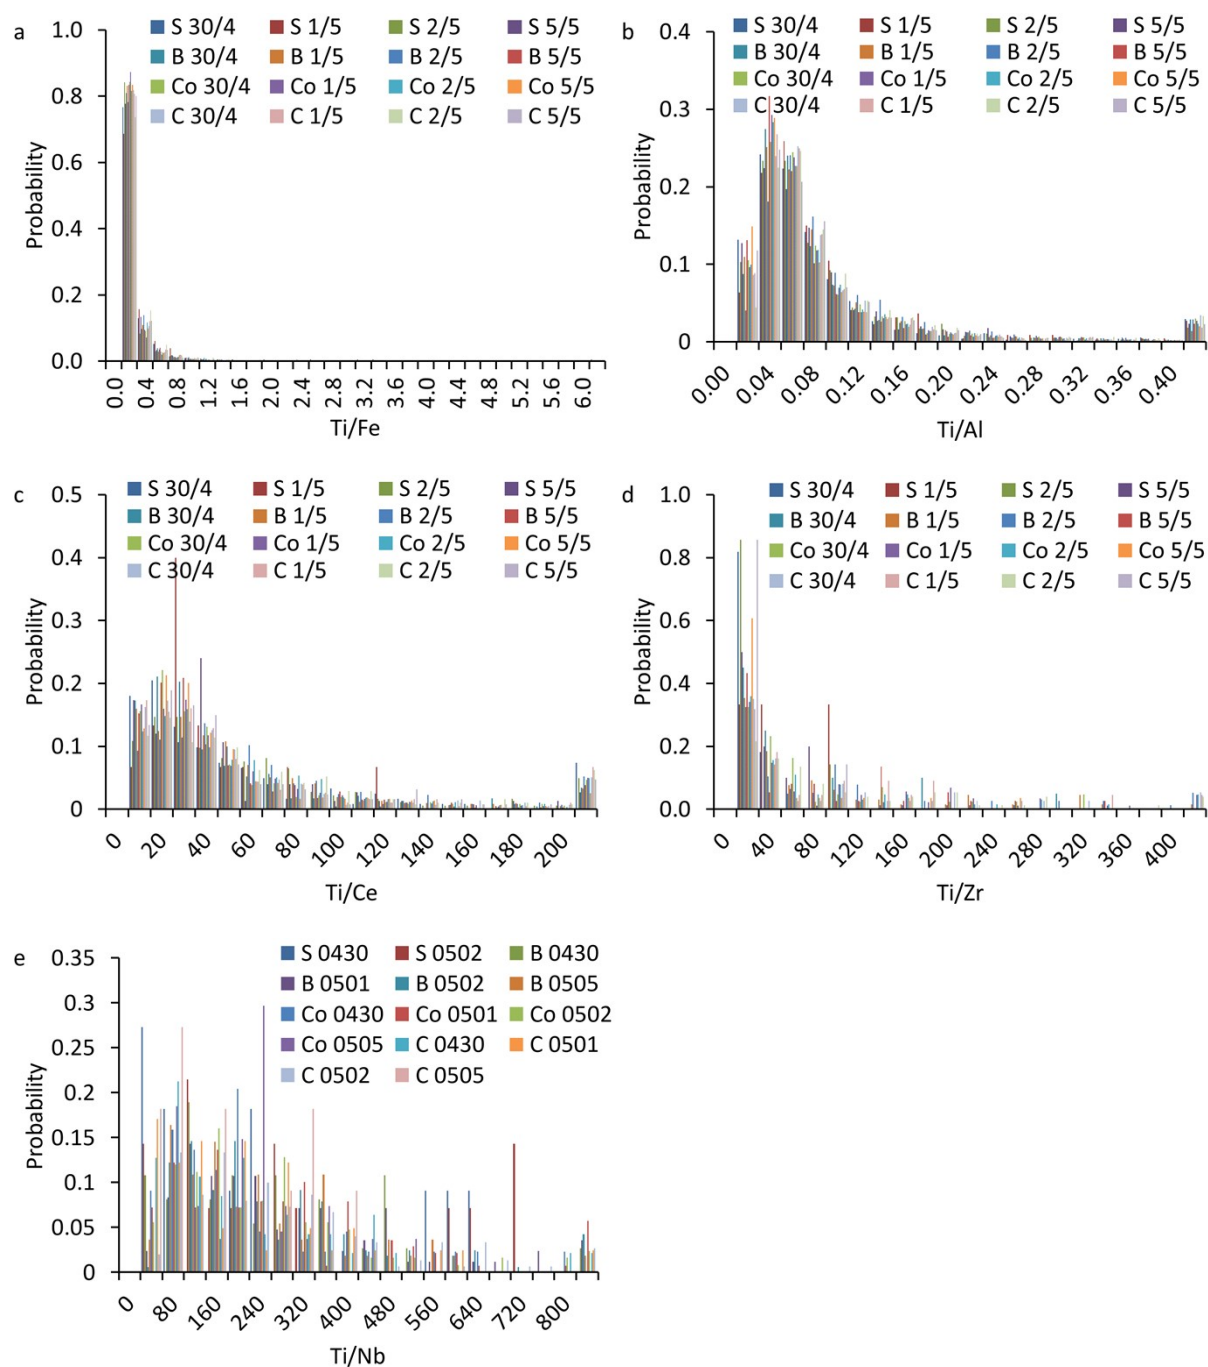

**Figure S7.** Elemental ratios of (a) Ti/Fe, (b) Ti/Al, (c) Ti/Ce, (d) Ti/Zr, and (e) Ti/Nb in Al-rich clusters. S: Lower Saluda River, B: Broad River, Co: Congaree River at Columbia, and C: Congaree River at Cayce.

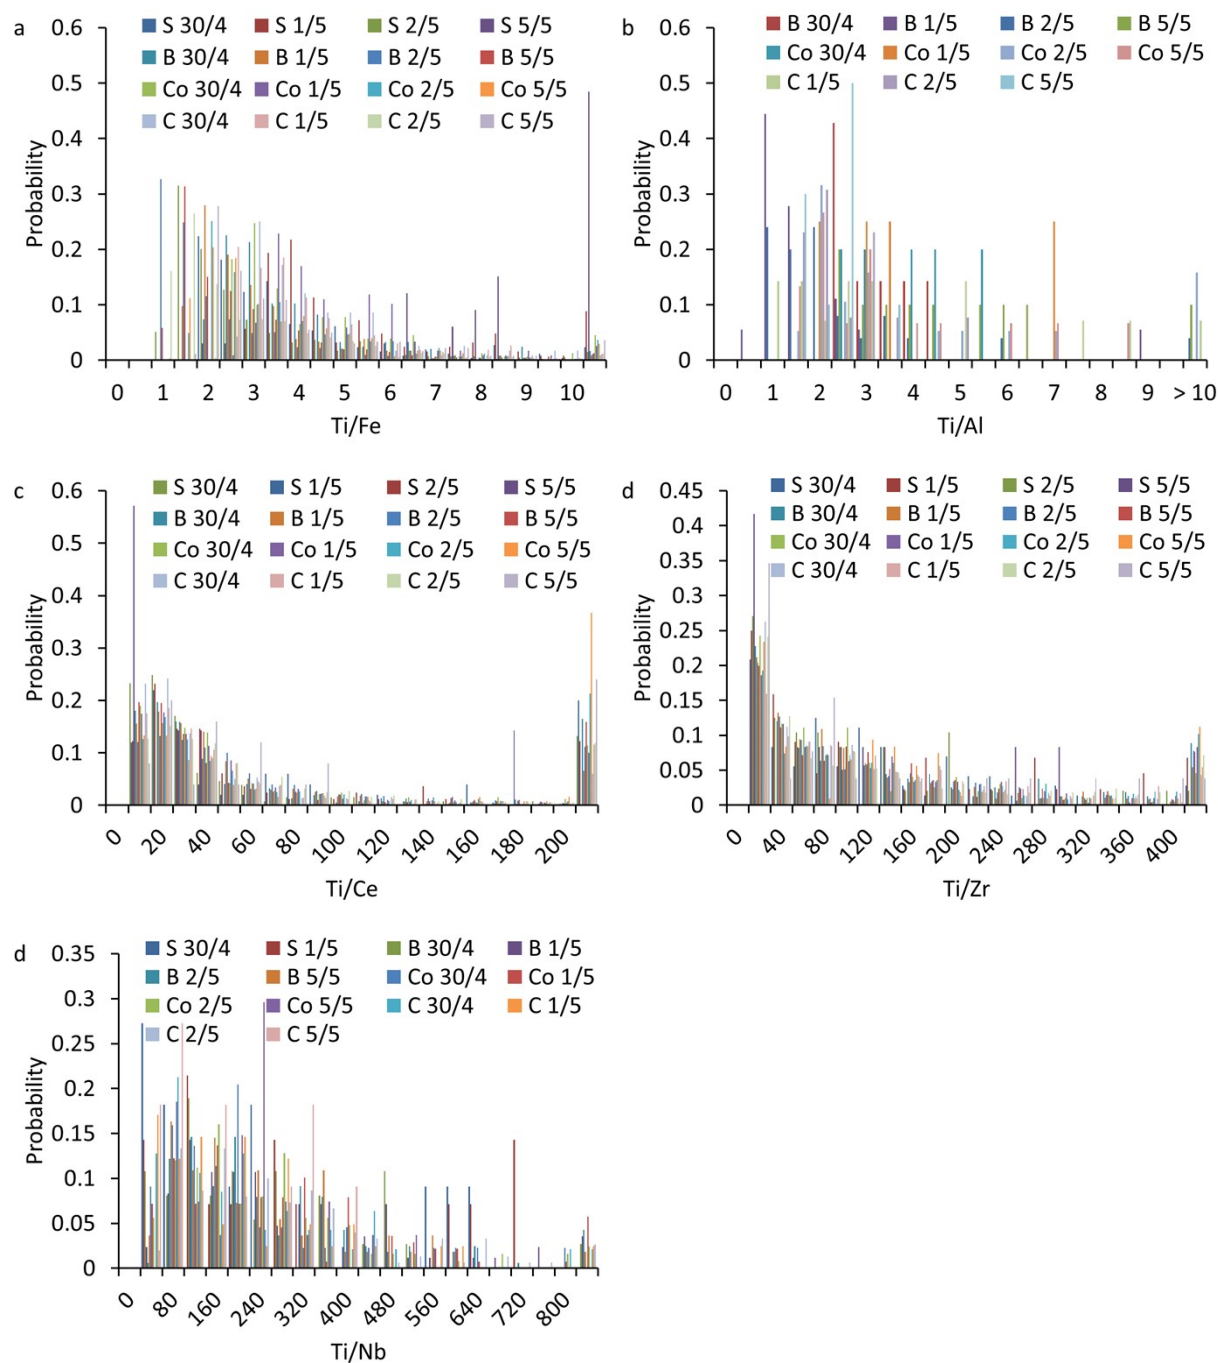

**Figure S8.** Elemental ratios of (a) Ti/Fe and (b) Ti/Al, and (c) Ti/Ce, (d) Ti/Zr, and (e) Ti/Nb in Ti-rich clusters. S: Lower Saluda River, B: Broad River, Co: Congaree River at Columbia, and C: Congaree River at Cayce.

1 **Table S6.** Descriptive statistics of the elemental ratios in mmNMs in Fe-rich particle cluster

|       |        | S 0430 | S 0501 | S 0502 | S 0505 | B0430 | B0501 | B0502 | B0505 | Co0430 | Co0501 | Co0502 | Co0505 | C0430 | C0501 | C0502 | C0505 |
|-------|--------|--------|--------|--------|--------|-------|-------|-------|-------|--------|--------|--------|--------|-------|-------|-------|-------|
| Ti/Al | Median | 0.08   | 0.07   | 0.11   | 0.07   | 0.06  | 0.10  |       | 0.06  | 0.07   | 0.07   | 0.11   | 0.08   | 0.09  | 0.09  | 0.08  | 0.12  |
|       | Mean   | 0.11   | 0.10   | 0.14   | 0.15   | 0.10  | 0.18  |       | 0.10  | 0.14   | 0.19   | 0.17   | 0.17   | 0.13  | 0.16  | 0.12  | 0.61  |
|       | STD    | 0.14   | 0.09   | 0.11   | 0.25   | 0.25  | 0.20  |       | 0.14  | 0.31   | 0.54   | 0.18   | 0.32   | 0.12  | 0.41  | 0.17  | 0.90  |
|       | Count  | 242    | 92     | 21     | 79     | 311   | 129   |       | 409   | 187    | 26     | 46     | 70     | 40    | 166   | 349   | 27    |
| Ti/Fe | Median | 0.24   | 0.37   | 0.28   | 0.45   | 0.15  | 0.15  | 0.15  | 0.12  | 0.14   | 0.13   | 0.14   | 0.17   | 0.16  | 0.16  | 0.14  | 0.41  |
|       | Mean   | 0.34   | 0.58   | 0.32   | 0.78   | 0.25  | 0.24  | 0.19  | 0.17  | 0.25   | 0.25   | 0.23   | 0.27   | 0.29  | 0.29  | 0.19  | 0.96  |
|       | STD    | 0.33   | 0.60   | 0.22   | 0.92   | 0.31  | 0.23  | 0.13  | 0.17  | 0.32   | 0.39   | 0.25   | 0.26   | 0.38  | 0.36  | 0.15  | 1.73  |
|       | Count  | 2516   | 1594   | 1555   | 1779   | 3841  | 3588  | 3725  | 4741  | 3958   | 5876   | 5485   | 3325   | 3375  | 4578  | 4547  | 2217  |
| Ti/Ce | Median | 25     | 29     | 23     | 26     | 24    | 31    | 35    | 25    | 24     | 29     | 28     | 20     | 22    | 29    | 37    | 23    |
|       | Mean   | 48     | 69     | 45     | 88     | 50    | 56    | 50    | 46    | 56     | 82     | 54     | 50     | 53    | 70    | 62    | 70    |
|       | STD    | 83     | 118    | 58     | 218    | 109   | 100   | 55    | 79    | 111    | 188    | 90     | 109    | 104   | 185   | 106   | 140   |
|       | Count  | 160    | 74     | 56     | 61     | 366   | 543   | 465   | 444   | 378    | 740    | 462    | 167    | 222   | 515   | 640   | 69    |
| T/Zr  | Median | 33     | 46     | 23     | 37     | 37    | 53    | 28    | 15    | 34     | 67     | 30     | 11     | 40    | 61    | 23    | 27    |
|       | Mean   | 55     | 82     | 50     | 74     | 67    | 81    | 44    | 63    | 94     | 134    | 74     | 43     | 74    | 77    | 53    | 103   |
|       | STD    | 52     | 119    | 53     | 94     | 91    | 95    | 46    | 103   | 140    | 178    | 119    | 78     | 83    | 77    | 104   | 174   |
|       | Count  | 13     | 15     | 6      | 18     | 42    | 84    | 82    | 48    | 48     | 117    | 61     | 17     | 42    | 64    | 89    | 35    |
| T/Nb  | Median | 160    | 90     | 172    | 141    | 123   | 184   | 128   | 132   | 173    | 230    | 160    | 79     | 168   | 215   | 152   | 181   |
|       | Mean   | 156    | 183    | 172    | 245    | 239   | 240   | 154   | 170   | 230    | 280    | 204    | 228    | 189   | 273   | 187   | 237   |
|       | STD    | 98     | 300    | 1      | 217    | 455   | 194   | 104   | 131   | 258    | 221    | 198    | 333    | 142   | 253   | 150   | 202   |
|       | Count  | 18     | 25     | 2      | 23     | 47    | 125   | 106   | 55    | 71     | 190    | 94     | 23     | 70    | 97    | 117   | 76    |

2

3

4 **Table S7.** Descriptive statistics of the elemental ratios in mmNMs in Al-rich particle cluster

|       |            | S 0430 | S 0501 | S 0502 | S 0505 | B 0430 | B 0501 | B 0502 | B 0505 | Co0430 | Co0501 | Co0502 | Co0505 | C 0430 | C 0501 | C 0502 | C 0505 |
|-------|------------|--------|--------|--------|--------|--------|--------|--------|--------|--------|--------|--------|--------|--------|--------|--------|--------|
| Ti/Al | Media<br>n | 0.05   | 0.06   | 0.05   | 0.06   | 0.05   | 0.05   | 0.06   | 0.04   | 0.05   | 0.05   | 0.05   | 0.04   | 0.05   | 0.05   | 0.06   | 0.05   |
|       | Mean       | 0.08   | 0.09   | 0.09   | 0.08   | 0.09   | 0.08   | 0.10   | 0.08   | 0.09   | 0.09   | 0.08   | 0.07   | 0.10   | 0.08   | 0.10   | 0.09   |
|       | STD        | 0.14   | 0.11   | 0.15   | 0.09   | 0.16   | 0.09   | 0.12   | 0.12   | 0.16   | 0.18   | 0.11   | 0.11   | 0.19   | 0.11   | 0.13   | 0.16   |
|       | Count      | 720    | 220    | 766    | 558    | 1575   | 1964   | 2379   | 2634   | 2021   | 4086   | 4204   | 2553   | 1670   | 1844   | 2268   | 1008   |
| Ti/Fe | Media<br>n | 0.09   | 0.13   | 0.07   | 0.09   | 0.09   | 0.08   | 0.10   | 0.08   | 0.07   | 0.07   | 0.09   | 0.07   | 0.08   | 0.09   | 0.13   | 0.08   |
|       | Mean       | 0.20   | 0.30   | 0.17   | 0.20   | 0.18   | 0.14   | 0.18   | 0.15   | 0.15   | 0.14   | 0.17   | 0.15   | 0.17   | 0.15   | 0.22   | 0.20   |
|       | STD        | 0.43   | 0.74   | 0.41   | 0.50   | 0.31   | 0.23   | 0.36   | 0.32   | 0.30   | 0.29   | 0.32   | 0.31   | 0.34   | 0.21   | 0.34   | 0.97   |
|       | Count      | 634    | 179    | 704    | 531    | 1239   | 1633   | 1726   | 2123   | 1680   | 3805   | 3545   | 2402   | 1380   | 1590   | 1571   | 966    |
| Ti/Ce | Media<br>n | 27     | 28     | 40     | 34     | 24     | 36     | 43     | 25     | 28     | 30     | 37     | 27     | 32     | 31     | 41     | 31     |
|       | Mean       | 60     | 37     | 60     | 50     | 44     | 54     | 68     | 52     | 57     | 63     | 65     | 47     | 65     | 68     | 82     | 55     |
|       | STD        | 97     | 28     | 68     | 69     | 60     | 71     | 83     | 97     | 105    | 137    | 111    | 68     | 132    | 180    | 170    | 75     |
|       | Count      | 122    | 15     | 184    | 75     | 232    | 613    | 580    | 388    | 366    | 1220   | 811    | 428    | 295    | 387    | 386    | 127    |
| Ti/Zr | Media<br>n | 13     | 30     | 15     | 17     | 28     | 32     | 61     | 49     | 37     | 47     | 36     | 11     | 38     | 43     | 57     | 5      |
|       | Mean       | 17     | 40     | 25     | 27     | 55     | 78     | 108    | 74     | 65     | 108    | 93     | 41     | 102    | 123    | 108    | 18     |
|       | STD        | 10     | 39     | 29     | 25     | 75     | 99     | 144    | 82     | 79     | 151    | 170    | 62     | 132    | 236    | 133    | 30     |
|       | Count      | 11     | 3      | 7      | 10     | 20     | 65     | 77     | 37     | 43     | 88     | 64     | 28     | 37     | 22     | 74     | 7      |
| Ti/Nb | Media<br>n | 189    |        | 203    |        | 176    | 208    | 198    | 187    | 162    | 214    | 194    | 203    | 149    | 162    | 225    | 137    |
|       | Mean       | 236    |        | 293    |        | 243    | 275    | 264    | 227    | 200    | 294    | 237    | 202    | 198    | 242    | 266    | 162    |
|       | STD        | 233    |        | 253    |        | 284    | 220    | 225    | 182    | 174    | 321    | 205    | 109    | 202    | 406    | 204    | 134    |
|       | Count      | 11     |        | 14     |        | 37     | 84     | 164    | 55     | 44     | 139    | 125    | 27     | 47     | 41     | 150    | 11     |

5

6

7 **Table S8.** Descriptive statistics of the elemental ratios in mmNMs in Ti-rich particle cluster

|       |        | S 0430 | S 0501 | S 0502 | S 0505 | B 0430 | B 0501 | B 0502 | B 0505 | Co0430 | Co0501 | Co0502 | Co0505 | C 0430 | C 0501 | C 0502 | C 0505 |
|-------|--------|--------|--------|--------|--------|--------|--------|--------|--------|--------|--------|--------|--------|--------|--------|--------|--------|
| T/Al  | Median | 2.1    |        |        | 5.2    | 3.0    | 1.0    | 1.6    | 3.8    | 3.9    | 3.0    | 2.5    | 2.5    |        | 2.3    | 1.7    | 2.1    |
|       | Mean   | 2.3    |        |        | 6.4    | 2.9    | 1.5    | 2.2    | 5.7    | 3.7    | 3.6    | 5.0    | 3.3    |        | 3.6    | 2.2    | 2.0    |
|       | STD    | 0.8    |        |        | 5.6    | 0.8    | 1.9    | 2.1    | 5.7    | 1.3    | 2.1    | 5.3    | 2.1    |        | 3.0    | 1.1    | 0.7    |
|       | Count  | 3      |        |        | 4      | 7      | 18     | 25     | 10     | 5      | 4      | 19     | 15     |        | 14     | 13     | 10     |
| T/Fe  | Median | 2.9    | 4.2    | 1.8    | 8.5    | 3.0    | 2.4    | 1.3    | 1.9    | 3.3    | 4.1    | 2.7    | 2.5    | 3.6    | 3.3    | 1.7    | 2.8    |
|       | Mean   | 3.5    | 7.7    | 2.5    | 20.3   | 3.7    | 2.9    | 2.0    | 2.6    | 4.3    | 4.7    | 3.7    | 3.6    | 4.2    | 3.9    | 2.5    | 3.7    |
|       | STD    | 2.1    | 22.9   | 2.3    | 41.1   | 2.1    | 1.8    | 2.0    | 2.4    | 2.9    | 2.1    | 3.3    | 4.4    | 1.8    | 1.8    | 2.1    | 3.2    |
|       | Count  | 259    | 124    | 409    | 33     | 244    | 236    | 648    | 465    | 154    | 118    | 410    | 402    | 116    | 264    | 509    | 360    |
| Ti/Ce | Median | 21.0   | 30.8   | 29.7   | 6.9    | 26.6   | 30.4   | 41.0   | 27.8   | 30.8   | 30.4   | 39.0   | 56.4   | 21.4   | 29.5   | 37.7   | 44.9   |
|       | Mean   | 94.7   | 888.0  | 130.8  | 36.7   | 160.1  | 72.5   | 115.2  | 161.1  | 115.1  | 104.5  | 237.3  | 399.4  | 73.6   | 103.0  | 110.7  | 141.3  |
|       | STD    | 249.6  | 3809.0 | 338.6  | 64.3   | 480.9  | 210.5  | 293.3  | 458.3  | 288.0  | 315.4  | 652.7  | 697.4  | 264.5  | 302.7  | 255.7  | 212.0  |
|       | Count  | 129    | 50     | 82     | 7      | 371    | 2178   | 2361   | 508    | 332    | 880    | 671    | 128    | 380    | 906    | 1960   | 25     |
| Ti/Zr | Median | 90     | 65     | 60     | 62     | 82     | 71     | 77     | 90     | 69     | 94     | 103    | 111    | 69     | 97     | 82     | 73     |
|       | Mean   | 112    | 353    | 109    | 86     | 144    | 126    | 141    | 162    | 111    | 152    | 191    | 154    | 107    | 151    | 142    | 134    |
|       | STD    | 108    | 1254   | 187    | 96     | 167    | 181    | 201    | 288    | 137    | 180    | 447    | 202    | 131    | 196    | 184    | 193    |
|       | Count  | 72     | 44     | 48     | 12     | 158    | 732    | 1055   | 251    | 198    | 301    | 364    | 107    | 232    | 295    | 879    | 26     |
| Ti/Nb | Median | 167    | 219    | 160    | 262    | 207    | 195    | 235    | 214    | 158    | 193    | 256    | 265    | 164    | 206    | 237    | 217    |
|       | Mean   | 226    | 272    | 233    | 263    | 259    | 275    | 294    | 280    | 235    | 264    | 317    | 314    | 231    | 299    | 297    | 255    |
|       | STD    | 202    | 236    | 273    | 183    | 215    | 334    | 244    | 241    | 247    | 243    | 296    | 295    | 214    | 333    | 268    | 204    |
|       | Count  | 125    | 59     | 69     | 37     | 312    | 1103   | 2177   | 535    | 333    | 611    | 723    | 180    | 318    | 477    | 1796   | 69     |

8

9

## 6. Gadolinium anomaly

The major anthropogenic source of anthropogenic Gd is domestic sewage effluent, widely recognized as the major source of Gd in polluted streams. Anomalies in REE patterns are commonly quantified by the ratio of the normalized measured concentration of the normalized theoretical concentration (determined by interpolation between neighboring elements) for the anomalous element. Here, we use neodymium (Nd) and samarium (Sm) to extrapolate the background Gd values in the samples, and to quantify Gd anomalies according to Eq. 1<sup>13</sup>.

$$Gd_N/Gd_N^* = Gd_N/10^{(2\log Sm - \log Nd)} \quad (\text{Eq. 1})$$

A size of  $Gd_N/Gd_N^* = 1.5$  is commonly used as the benchmark to distinguish between the natural and anthropogenic Gd anomaly. The size of the Gd anomalies varied in the range from  $Gd_N/Gd_N^* = 1.1 \pm 0.0$  and  $2.1 \pm 0.1$  (**Figure S9b**), suggesting that there is minimal or absence of Gd anomaly during the sampling event in the Saluda, Broad and Congaree River surface water which might be attributed to insignificant (mean: 5.2%) contribution of WWTP effluent discharge into the river stream in comparison to the direct runoff.

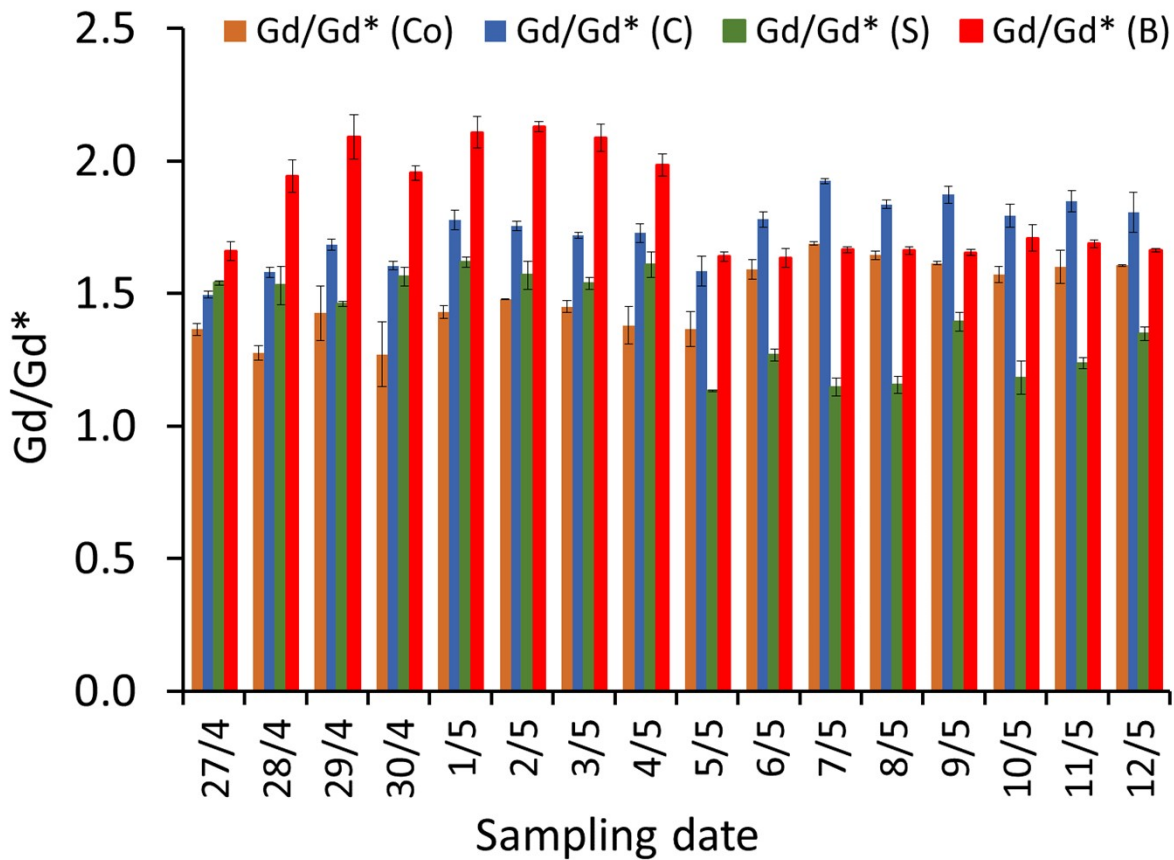

**Figure S9.** Gadolinium anomaly in Saluda River (S), Broad River (B), Congaree River, Columbia (Co), Congaree River, Cayce (C) based on the equation 1.

29 **Table S9.** Gd anomalies across the world.

| SI | Country        | Location                                                             | $Gd_N/Gd_N^*$ size                | Reference |
|----|----------------|----------------------------------------------------------------------|-----------------------------------|-----------|
| 1  | USA            | River waters in Pennsylvania                                         | 1.58 to 4.94                      | 14        |
| 2  | Germany        | Rhine River                                                          | 4.4 to 21                         | 15        |
| 3  | Germany        | Wupper River, Leverkusen; Others: Sieg, Rhein, Elbe, and Mosel River | 9.1 to 30; other rivers: 1.5 to 3 | 16        |
| 4  | Germany        | Spree, Dahme, Upper Havel River                                      | 1.6 to 1.8                        | 17        |
| 5  | France         | Vene River                                                           | 2.1 to 5.25                       | 18        |
| 6  | Czech Republic | Berounka, Vltava, Jizera River                                       | 1.1 to 11.3                       | 19        |
| 7  | Japan          | Ara, Tama, and Tone River                                            | 1.0 to 7.0                        | 20        |
| 8  | Luxembourg     | Alzette River                                                        | 20 to 30                          | 21        |

30

31

## References:

1. U.S. Army Corps of Engineers & Stanley Consultants. *Saluda River Basin, Charleston district navigability study*. (1977).
2. Congaree River Keeper. Lower Saluda River. Available at:  
<https://www.congareeriverkeeper.org/lower-saluda-river>. (Accessed: 8th January 2021)
3. SCDHEC. *Watershed Water Quality Assessment Saluda River Basin*. (2011).
4. SCDOT. Annual average daily traffic. (2019). Available at:  
<https://www.scdot.org/travel/pdf/trafficcounts/2019/Lexington.pdf>. (Accessed: 2nd April 2021)
5. SCDOT. Annual average daily traffic. (2019). Available at:  
<https://www.scdot.org/travel/pdf/trafficcounts/2019/Richland.pdf>. (Accessed: 1st April 2021)
6. U.S. Geological Survey (USGS). USGS Current Conditions for USGS 02162285 TABLE ROCK RESERVOIR NR CLEVELAND, SC. Available at:  
[https://waterdata.usgs.gov/nwis/dv?cb\\_00045=on&format=html&site\\_no=02162285&referred\\_module=sw&period=&begin\\_date=2020-04-27&end\\_date=2020-05-12](https://waterdata.usgs.gov/nwis/dv?cb_00045=on&format=html&site_no=02162285&referred_module=sw&period=&begin_date=2020-04-27&end_date=2020-05-12). (Accessed: 10th January 2021)
7. NC DEQ. *Broad river Basin restoration priorities*. (2009).
8. U.S. Geological Survey (USGS). USGS Current Conditions for USGS 03451500 FRENCH BROAD RIVER AT ASHEVILLE, NC. Available at:  
[https://waterdata.usgs.gov/nwis/dv?cb\\_00045=on&format=html&site\\_no=03451500&referred\\_module=sw&period=&begin\\_date=2020-04-20&end\\_date=2020-05-10](https://waterdata.usgs.gov/nwis/dv?cb_00045=on&format=html&site_no=03451500&referred_module=sw&period=&begin_date=2020-04-20&end_date=2020-05-10). (Accessed: 8th January 2021)
9. City of Knoxville. Rainfall Data - City of Knoxville. Available at:

- 54 [https://knoxvilletn.gov/government/city\\_departments\\_offices/engineering/stormwater\\_engineering](https://knoxvilletn.gov/government/city_departments_offices/engineering/stormwater_engineering)  
55 [\\_division/rainfall\\_data](#). (Accessed: 8th January 2021)
- 56 10. Loosli, F. *et al.* Sewage spills are a major source of titanium dioxide engineered (nano)-particle  
57 release into the environment. *Environ. Sci. Nano* **6**, 763–777 (2019).
- 58 11. Nabi, M. M., Wang, J. & Baalousha, M. Episodic surges in titanium dioxide engineered particle  
59 concentrations in surface waters following rainfall events. *Chemosphere* **263**, 128261 (2021).
- 60 12. Jochum, K. P. *et al.* Reference Values Following ISO Guidelines for Frequently Requested Rock  
61 Reference Materials. *Geostand. Geoanalytical Res.* **40**, 333–350 (2016).
- 62 13. Kulaksiz, S. & Bau, M. Contrasting behaviour of anthropogenic gadolinium and natural rare earth  
63 elements in estuaries and the gadolinium input into the North Sea. *Earth Planet. Sci. Lett.* **260**,  
64 361–371 (2007).
- 65 14. Bau, M., Knappe, A. & Dulski, P. Anthropogenic gadolinium as a micropollutant in river waters in  
66 Pennsylvania and in Lake Erie, northeastern United States. *Chemie der Erde* **66**, 143–152 (2006).
- 67 15. Kulaksiz, S. & Bau, M. Rare earth elements in the Rhine River, Germany: First case of  
68 anthropogenic lanthanum as a dissolved microcontaminant in the hydrosphere. *Environ. Int.* **37**,  
69 973–979 (2011).
- 70 16. Bau, M. & Dulski, P. Anthropogenic origin of positive gadolinium anomalies in river waters.  
71 *Earth Planet. Sci. Lett.* **143**, 245–255 (1996).
- 72 17. Knappe, A., Möller, P., Dulski, P. & Pekdeger, A. Positive gadolinium anomaly in surface water  
73 and ground water of the urban area Berlin, Germany. *Geochemistry* **65**, 167–189 (2005).
- 74 18. Elbaz-Poulichet, F., Seidel, J. L. & Othoniel, C. Occurrence of an anthropogenic gadolinium  
75 anomaly in river and coastal waters of Southern France. *Water Res.* **36**, 1102–1105 (2002).

- 76 19. Möller, P., Paces, T., Dulski, P. & Morteani, G. Anthropogenic Gd in surface water, drainage  
77 system, and the water supply of the City of Prague, Czech Republic. *Environ. Sci. Technol.* **36**,  
78 2387–2394 (2002).
- 79 20. Nozaki, Y., Lerche, D., Alibo, D. S. & Tsutsumi, M. Dissolved indium and rare earth elements in  
80 three Japanese rivers and Tokyo Bay: Evidence for anthropogenic Gd and In. *Geochim.*  
81 *Cosmochim. Acta* **64**, 3975–3982 (2000).
- 82 21. Hissler, C., Stille, P., Guignard, C., François Iffly, J. & Pfister, L. Rare Earth Elements as  
83 hydrological tracers of anthropogenic and critical zone contributions: a case study at the Alzette  
84 River basin scale. *Procedia Earth Planet. Sci.* **10**, 349–352 (2014).
